# Supplementary material
Source: publisher figshare collection journal article supplement (https://karger.figshare.com/articles/dataset/_/5121130)
Supplement: Supplementary file 1 [file 1]

**Supplementary Table 1.** Validation of array CGH findings by FISH for the seven FFPE archival osteosarcoma samples. For each sample, signals were enumerated by counting spots in 100 non-overlapped, intact interphase nuclei per tumor tissue section.

| Probe<br>(gene) | Sample | Population of cells enumerated as containing indicated number<br>of signals |    |          |         |     |
|-----------------|--------|-----------------------------------------------------------------------------|----|----------|---------|-----|
|                 |        | 1                                                                           | 2  | polysomy | >5, <10 | >10 |
| <b>E2F3</b>     | OS-T1  | 8                                                                           | 24 | 68       | 0       | 0   |
|                 | OS-T2  | 15                                                                          | 50 | 35       | 0       | 0   |
|                 | OS-T3  | 3                                                                           | 10 | 57       | 30      | 0   |
|                 | OS-T7  | 0                                                                           | 0  | 18       | 36      | 46  |
|                 | OS-E1  | 5                                                                           | 3  | 12       | 20      | 60  |
|                 | OS-E2  | 3                                                                           | 5  | 24       | 38      | 30  |
|                 | OS-E3  | 20                                                                          | 45 | 35       | 0       | 0   |
| <b>RUNX2</b>    | OS-T1  | 5                                                                           | 35 | 60       | 0       | 0   |
|                 | OS-T2  | 5                                                                           | 10 | 35       | 40      | 10  |
|                 | OS-T3  | 1                                                                           | 9  | 55       | 35      | 0   |
|                 | OS-T7  | 0                                                                           | 8  | 46       | 38      | 8   |
|                 | OS-E1  | 5                                                                           | 2  | 28       | 25      | 40  |
|                 | OS-E2  | 5                                                                           | 10 | 20       | 40      | 20  |
|                 | OS-E3  | 5                                                                           | 10 | 20       | 26      | 33  |
| <b>PIM1</b>     | OS-T1  | 10                                                                          | 45 | 45       | 0       | 0   |
|                 | OS-T2  | 15                                                                          | 15 | 70       | 0       | 0   |
|                 | OS-T3  | 5                                                                           | 15 | 55       | 25      | 0   |
|                 | OS-T7  | 10                                                                          | 55 | 35       | 0       | 0   |
|                 | OS-E1  | 3                                                                           | 10 | 47       | 25      | 15  |
|                 | OS-E2  | 8                                                                           | 10 | 59       | 18      | 5   |
|                 | OS-E3  | 15                                                                          | 20 | 65       | 0       | 0   |
| <b>FBXO9</b>    | OS-T1  | 5                                                                           | 37 | 58       | 0       | 0   |
|                 | OS-T2  | 10                                                                          | 20 | 70       | 0       | 0   |
|                 | OS-T3  | 10                                                                          | 20 | 60       | 10      | 0   |
|                 | OS-T7  | 5                                                                           | 50 | 45       | 0       | 0   |
|                 | OS-E1  | 5                                                                           | 10 | 35       | 35      | 15  |
|                 | OS-E2  | 15                                                                          | 8  | 50       | 22      | 5   |
|                 | OS-E3  | 10                                                                          | 30 | 60       | 0       | 0   |

Polysomy: 3-5 copies of balanced target gene and CEP 6 signals

Amplification cut-off: 10%

N.B. Conclusions were based on CEP 6 signal enumeration, which was performed as described in Materials and Methods.

**Supplementary Table 2.** Enumeration of segmental duplications on chromosome 6. Segmental duplications were quantified according to length of at least 5 kbp or at least 10 kbp and then arranged by cytoband. Clusters of segmental duplications 10 kbp or larger surround the region of gain ~6p21–12 common in osteosarcoma. From the aCGH analysis of 15 osteosarcoma patient samples, frequencies of partial or complete gain and/or amplification in the cohort are indicated for each cytoband. The mouse chromosomes homologous to the human chromosome 6p cytobands are listed.

| Cytoband          | Number of segmental duplications with given length |                     | Cluster label and base pair length | Frequency of Partial or Complete Gain and/or Amplification (% of 15 samples) | Mouse Chromosome demonstrating homology |
|-------------------|----------------------------------------------------|---------------------|------------------------------------|------------------------------------------------------------------------------|-----------------------------------------|
|                   | Minimum length 5kb                                 | Minimum length 10kb |                                    |                                                                              |                                         |
| 6p25.3            | 191                                                | 64                  | A (288kb)                          | 53.33                                                                        | 13                                      |
| 6p25.2            | 45                                                 | 0                   |                                    | 53.33                                                                        | 13                                      |
| 6p25.1            | 184                                                | 0                   |                                    | 53.33                                                                        | 13                                      |
| 6p24.3            | 171                                                | 0                   |                                    | 53.33                                                                        | 13                                      |
| 6p24.2            | 0                                                  | 0                   |                                    | 46.67                                                                        | 13                                      |
| 6p24.1            | 5                                                  | 0                   |                                    | 53.33                                                                        | 13                                      |
| 6p23              | 17                                                 | 0                   |                                    | 53.33                                                                        | 13                                      |
| 6p22.3            | 148                                                | 0                   | B (256kb)                          | 60.00                                                                        | 13                                      |
| 6p22.2            | 137                                                | 0                   |                                    | 66.67                                                                        | 13                                      |
| 6p22.1            | 246                                                | 35                  |                                    | 66.67                                                                        | 17                                      |
| 6p21.33           | 95                                                 | 0                   | C (36kb)                           | 73.33                                                                        | 17                                      |
| 6p21.32           | 19                                                 | 14                  |                                    | 66.67                                                                        | 17                                      |
| 6p21.31           | 3                                                  | 0                   |                                    | 80.00                                                                        | 17                                      |
| 6p21.2            | 90                                                 | 0                   |                                    | 93.33                                                                        | 17                                      |
| 6p21.1            | 200                                                | 0                   |                                    | 93.33                                                                        | 17                                      |
| 6p12.3            | 421                                                | 1                   |                                    | 86.67                                                                        | 17, 1                                   |
| 6p12.2            | 237                                                | 0                   |                                    | 73.33                                                                        | 1                                       |
| 6p12.1            | 252                                                | 0                   | D (587kb)                          | 73.33                                                                        | 1,9                                     |
| 6p11.2            | 375                                                | 63                  |                                    | 66.67                                                                        | 1                                       |
| 6p11.1            | 166                                                | 20                  | E (609kb)                          | 53.33                                                                        | 1                                       |
| <i>CENTROMERE</i> |                                                    |                     |                                    |                                                                              |                                         |
| 6q11.1            | 21                                                 | 1                   |                                    |                                                                              |                                         |
| 6q11.2            | 0                                                  | 0                   |                                    |                                                                              |                                         |
| 6q12              | 185                                                | 3                   |                                    |                                                                              |                                         |
| 6q13              | 746                                                | 0                   |                                    |                                                                              |                                         |

|         |     |    |
|---------|-----|----|
| 6q14.1  | 702 | 0  |
| 6q14.2  | 92  | 0  |
| 6q14.3  | 503 | 0  |
| 6q15    | 336 | 1  |
| 6q16.1  | 372 | 0  |
| 6q16.2  | 108 | 0  |
| 6q16.3  | 478 | 0  |
| 6q21    | 587 | 0  |
| 6q22.1  | 292 | 0  |
| 6q22.2  | 150 | 0  |
| 6q22.31 | 400 | 0  |
| 6q22.32 | 83  | 0  |
| 6q22.33 | 162 | 0  |
| 6q23.1  | 54  | 0  |
| 6q23.2  | 150 | 4  |
| 6q23.3  | 51  | 0  |
| 6q24.1  | 243 | 0  |
| 6q24.2  | 33  | 0  |
| 6q24.3  | 36  | 0  |
| 6q25.1  | 56  | 0  |
| 6q25.2  | 0   | 0  |
| 6q25.3  | 206 | 0  |
| 6q26    | 159 | 1  |
| 6q27    | 140 | 62 |

---

**Supplementary Table 3.** Copy number transition locations and associated copy number change on chromosome 6 for 15 osteosarcoma samples according to aCGH. Areas of gain or loss are indicated for regions of copy number transition. Blue shading indicates chromosome 6p and unshaded regions represent chromosome 6q.

| Sample | Copy number transition locations on chromosome 6 |                            | Copy Number Change |
|--------|--------------------------------------------------|----------------------------|--------------------|
|        | Copy number transition start                     | Copy number transition end |                    |
| OS-T1  | 0                                                | 58,788,747                 | CN Gain            |
| OS-T1  | 62,040,890                                       | 170,899,992                | CN Gain            |
| OS-T2  | 0                                                | 11,622,225                 | CN Gain            |
| OS-T2  | 11,622,225                                       | 11,860,263                 | Amplification      |
| OS-T2  | 11,860,263                                       | 13,026,087                 | CN Gain            |
| OS-T2  | 13,026,087                                       | 13,755,152                 | Amplification      |
| OS-T2  | 13,755,152                                       | 29,776,341                 | CN Gain            |
| OS-T2  | 29,776,341                                       | 30,306,161                 | CN Loss            |
| OS-T2  | 30,306,161                                       | 39,097,151                 | CN Gain            |
| OS-T2  | 39,097,151                                       | 41,520,015                 | CN Loss            |
| OS-T2  | 41,520,015                                       | 44,837,825                 | CN Gain            |
| OS-T2  | 44,837,825                                       | 47,053,426                 | Amplification      |
| OS-T2  | 47,053,426                                       | 47,120,506                 | CN Gain            |
| OS-T2  | 47,120,506                                       | 53,837,523                 | CN Loss            |
| OS-T2  | 53,837,523                                       | 55,001,643                 | Amplification      |
| OS-T2  | 55,001,643                                       | 56,276,281                 | CN Loss            |
| OS-T2  | 56,276,281                                       | 56,667,629                 | CN Gain            |
| OS-T2  | 56,667,629                                       | 58,788,747                 | CN Loss            |
| OS-T2  | 62,040,890                                       | 63,734,002                 | CN Gain            |
| OS-T2  | 63,734,002                                       | 144,306,447                | CN Loss            |
| OS-T2  | 144,306,447                                      | 146,203,354                | CN Gain            |
| OS-T2  | 146,203,354                                      | 147,236,210                | CN Loss            |
| OS-T2  | 147,236,210                                      | 153,111,065                | CN Gain            |
| OS-T2  | 157,542,782                                      | 162,460,411                | CN Gain            |
| OS-T2  | 162,460,411                                      | 165,668,437                | CN Loss            |
| OS-T2  | 165,668,437                                      | 170,899,992                | CN Gain            |
| OS-T3  | 0                                                | 152,714                    | CN Gain            |
| OS-T3  | 152,714                                          | 327,686                    | CN Loss            |
| OS-T3  | 327,686                                          | 11,701,142                 | CN Gain            |
| OS-T3  | 11,701,142                                       | 12,988,149                 | Amplification      |
| OS-T3  | 12,988,149                                       | 43,947,864                 | CN Gain            |
| OS-T3  | 43,947,864                                       | 56,558,245                 | CN Loss            |
| OS-T3  | 56,558,245                                       | 58,788,747                 | CN Gain            |
| OS-T3  | 62,040,890                                       | 73,969,590                 | CN Loss            |
| OS-T3  | 73,969,590                                       | 74,671,647                 | CN Gain            |
| OS-T3  | 74,671,647                                       | 96,139,522                 | CN Loss            |
| OS-T3  | 96,139,522                                       | 96,960,954                 | CN Gain            |
| OS-T3  | 96,960,954                                       | 100,251,782                | CN Loss            |
| OS-T3  | 100,251,782                                      | 102,376,397                | CN Gain            |
| OS-T3  | 102,376,397                                      | 102,486,334                | CN Loss            |
| OS-T3  | 102,486,334                                      | 103,456,115                | CN Gain            |
| OS-T3  | 103,456,115                                      | 111,346,556                | CN Loss            |
| OS-T3  | 111,346,556                                      | 112,337,368                | CN Gain            |
| OS-T3  | 112,337,368                                      | 113,703,146                | Amplification      |
| OS-T3  | 113,703,146                                      | 116,868,566                | CN Gain            |
| OS-T3  | 116,868,566                                      | 118,492,574                | CN Loss            |
| OS-T3  | 118,492,574                                      | 129,885,385                | CN Gain            |
| OS-T3  | 129,885,385                                      | 133,196,167                | Amplification      |
| OS-T3  | 133,196,167                                      | 134,577,723                | CN Gain            |
| OS-T3  | 134,577,723                                      | 138,338,065                | Amplification      |

|       |             |             |                      |
|-------|-------------|-------------|----------------------|
| OS-T3 | 138,338,065 | 144,479,790 | CN Gain              |
| OS-T3 | 144,479,790 | 145,116,479 | Amplification        |
| OS-T3 | 145,116,479 | 147,504,385 | CN Loss              |
| OS-T3 | 147,504,385 | 147,950,912 | Amplification        |
| OS-T3 | 152,128,180 | 154,833,149 | CN Loss              |
| OS-T3 | 154,833,149 | 160,831,256 | CN Gain              |
| OS-T3 | 160,831,256 | 160,917,521 | Amplification        |
| OS-T3 | 160,917,521 | 161,311,701 | CN Loss              |
| OS-T3 | 161,311,701 | 161,618,903 | Amplification        |
| OS-T3 | 161,618,903 | 161,883,059 | CN Gain              |
| OS-T3 | 161,883,059 | 170,678,071 | CN Loss              |
| OS-T3 | 170,678,071 | 170,811,770 | Amplification        |
| OS-T3 | 170,811,770 | 170,899,992 | CN Loss              |
| OS-T4 | 0           | 32,539,336  | CN Gain              |
| OS-T4 | 32,539,336  | 32,786,995  | CN Loss              |
| OS-T4 | 32,786,995  | 54,823,633  | CN Gain              |
| OS-T4 | 54,823,633  | 54,944,045  | Amplification        |
| OS-T4 | 54,944,045  | 57,310,732  | CN Gain              |
| OS-T4 | 57,310,732  | 58,788,747  | CN Loss              |
| OS-T4 | 62,040,890  | 170,899,992 | CN Loss              |
| OS-T5 | 0           | 38,636,597  | CN Loss              |
| OS-T5 | 38,636,597  | 38,768,161  | CN Gain              |
| OS-T5 | 38,768,161  | 42,856,300  | CN Loss              |
| OS-T5 | 42,856,300  | 56,339,040  | CN Gain              |
| OS-T5 | 56,339,040  | 57,310,732  | CN Loss              |
| OS-T5 | 57,310,732  | 58,142,725  | CN Gain              |
| OS-T5 | 58,142,725  | 58,788,747  | CN Loss              |
| OS-T5 | 62,040,890  | 63,006,917  | CN Gain              |
| OS-T5 | 63,006,917  | 108,746,625 | CN Loss              |
| OS-T5 | 108,746,625 | 108,931,803 | Homozygous Copy Loss |
| OS-T5 | 108,931,803 | 170,899,992 | CN Loss              |
| OS-T6 | 0           | 37,423,792  | CN Loss              |
| OS-T6 | 37,423,792  | 42,244,459  | CN Gain              |
| OS-T6 | 42,244,459  | 44,865,136  | CN Loss              |
| OS-T6 | 44,865,136  | 49,949,400  | Amplification        |
| OS-T6 | 49,949,400  | 51,337,510  | CN Gain              |
| OS-T6 | 51,337,510  | 58,788,747  | CN Loss              |
| OS-T6 | 62,040,890  | 74,591,912  | CN Loss              |
| OS-T6 | 74,591,912  | 75,923,593  | Homozygous Copy Loss |
| OS-T6 | 75,923,593  | 82,266,195  | CN Loss              |
| OS-T6 | 82,266,195  | 82,532,187  | CN Gain              |
| OS-T6 | 82,532,187  | 169,593,858 | CN Loss              |
| OS-T6 | 169,593,858 | 169,988,076 | Homozygous Copy Loss |
| OS-T6 | 169,988,076 | 170,899,992 | CN Loss              |
| OS-T7 | 0           | 189,701     | Homozygous Copy Loss |
| OS-T7 | 189,701     | 327,686     | CN Loss              |
| OS-T7 | 327,686     | 20,146,787  | Homozygous Copy Loss |
| OS-T7 | 20,146,787  | 20,648,847  | Amplification        |
| OS-T7 | 20,648,847  | 21,513,978  | CN Gain              |
| OS-T7 | 21,513,978  | 22,257,067  | Amplification        |
| OS-T7 | 22,257,067  | 23,475,466  | CN Gain              |
| OS-T7 | 23,475,466  | 29,141,497  | Amplification        |
| OS-T7 | 29,141,497  | 29,541,638  | CN Gain              |
| OS-T7 | 29,541,638  | 31,008,596  | Amplification        |
| OS-T7 | 31,008,596  | 33,277,199  | CN Gain              |
| OS-T7 | 33,277,199  | 33,398,225  | CN Loss              |
| OS-T7 | 33,398,225  | 33,617,227  | CN Gain              |

|        |             |             |                      |
|--------|-------------|-------------|----------------------|
| OS-T7  | 33,617,227  | 34,516,439  | CN Loss              |
| OS-T7  | 34,516,439  | 34,832,392  | CN Gain              |
| OS-T7  | 34,832,392  | 35,293,444  | CN Loss              |
| OS-T7  | 35,293,444  | 36,283,819  | Amplification        |
| OS-T7  | 36,283,819  | 37,709,462  | CN Loss              |
| OS-T7  | 37,709,462  | 41,999,391  | Amplification        |
| OS-T7  | 41,999,391  | 42,615,744  | CN Gain              |
| OS-T7  | 42,615,744  | 46,721,457  | Amplification        |
| OS-T7  | 46,721,457  | 49,715,179  | CN Gain              |
| OS-T7  | 49,715,179  | 52,954,066  | Amplification        |
| OS-T7  | 52,954,066  | 57,310,732  | CN Gain              |
| OS-T7  | 57,310,732  | 58,212,034  | CN Loss              |
| OS-T7  | 58,212,034  | 58,788,747  | CN Gain              |
| OS-T7  | 62,040,890  | 70,683,594  | CN Loss              |
| OS-T7  | 70,683,594  | 72,705,166  | Homozygous Copy Loss |
| OS-T7  | 72,705,166  | 89,935,258  | CN Loss              |
| OS-T7  | 89,935,258  | 92,366,541  | CN Gain              |
| OS-T7  | 92,366,541  | 98,679,921  | CN Loss              |
| OS-T7  | 98,679,921  | 117,615,498 | Homozygous Copy Loss |
| OS-T7  | 117,615,498 | 170,899,992 | CN Loss              |
| OS-T8  | 0           | 26,127,208  | CN Gain              |
| OS-T8  | 26,127,208  | 26,247,695  | CN Loss              |
| OS-T8  | 26,247,695  | 29,124,576  | CN Gain              |
| OS-T8  | 29,124,576  | 29,508,321  | CN Loss              |
| OS-T8  | 29,508,321  | 52,526,065  | CN Gain              |
| OS-T8  | 52,526,065  | 53,618,925  | Amplification        |
| OS-T8  | 53,618,925  | 58,788,747  | CN Gain              |
| OS-T8  | 62,040,890  | 124,871,922 | CN Loss              |
| OS-T8  | 124,871,922 | 138,604,858 | CN Gain              |
| OS-T8  | 141,356,365 | 142,361,196 | CN Loss              |
| OS-T8  | 158,545,194 | 159,401,000 | Amplification        |
| OS-T8  | 159,401,000 | 160,298,910 | CN Gain              |
| OS-T8  | 160,298,910 | 163,194,893 | Amplification        |
| OS-T8  | 163,194,893 | 165,167,959 | CN Gain              |
| OS-T8  | 165,167,959 | 165,580,597 | Amplification        |
| OS-T8  | 165,580,597 | 170,899,992 | CN Loss              |
| OS-T9  | 0           | 670,563     | Homozygous Copy Loss |
| OS-T9  | 670,563     | 23,580,255  | CN Loss              |
| OS-T9  | 23,580,255  | 58,788,747  | CN Gain              |
| OS-T9  | 62,040,890  | 72,413,422  | CN Gain              |
| OS-T9  | 72,413,422  | 111,501,835 | CN Loss              |
| OS-T9  | 111,501,835 | 111,794,439 | CN Gain              |
| OS-T9  | 111,794,439 | 170,899,992 | CN Loss              |
| OS-T10 | 0           | 29,956,857  | CN Loss              |
| OS-T10 | 29,956,857  | 30,066,168  | CN Gain              |
| OS-T10 | 30,066,168  | 35,940,960  | CN Loss              |
| OS-T10 | 35,940,960  | 36,497,864  | Amplification        |
| OS-T10 | 36,497,864  | 36,843,127  | CN Gain              |
| OS-T10 | 36,843,127  | 37,709,462  | Amplification        |
| OS-T10 | 37,709,462  | 38,188,441  | CN Gain              |
| OS-T10 | 38,188,441  | 38,768,161  | Amplification        |
| OS-T10 | 38,768,161  | 39,599,619  | CN Gain              |
| OS-T10 | 39,599,619  | 46,657,126  | Amplification        |
| OS-T10 | 46,657,126  | 49,620,310  | CN Gain              |
| OS-T10 | 49,620,310  | 50,021,645  | Amplification        |
| OS-T10 | 50,021,645  | 51,533,541  | CN Gain              |
| OS-T10 | 51,533,541  | 57,038,952  | CN Loss              |
| OS-T10 | 57,038,952  | 58,788,747  | CN Gain              |

|        |             |             |                      |
|--------|-------------|-------------|----------------------|
| OS-T10 | 62,040,890  | 63,900,027  | Amplification        |
| OS-T10 | 63,900,027  | 66,310,880  | CN Loss              |
| OS-T10 | 66,310,880  | 68,692,340  | CN Gain              |
| OS-T10 | 68,692,340  | 71,055,544  | CN Loss              |
| OS-T10 | 71,055,544  | 71,181,602  | CN Gain              |
| OS-T10 | 71,181,602  | 73,358,634  | CN Loss              |
| OS-T10 | 73,358,634  | 76,479,046  | CN Gain              |
| OS-T10 | 76,479,046  | 89,041,331  | CN Loss              |
| OS-T10 | 89,041,331  | 90,062,245  | CN Gain              |
| OS-T10 | 90,062,245  | 99,138,116  | CN Loss              |
| OS-T10 | 99,138,116  | 99,702,878  | Homozygous Copy Loss |
| OS-T10 | 99,702,878  | 100,538,401 | CN Gain              |
| OS-T10 | 100,538,401 | 100,975,961 | CN Loss              |
| OS-T10 | 100,975,961 | 101,604,606 | CN Gain              |
| OS-T10 | 101,604,606 | 103,971,881 | CN Loss              |
| OS-T10 | 103,971,881 | 104,624,363 | CN Gain              |
| OS-T10 | 104,624,363 | 114,279,559 | CN Loss              |
| OS-T10 | 114,279,559 | 114,582,556 | CN Gain              |
| OS-T10 | 114,582,556 | 136,172,136 | CN Loss              |
| OS-T10 | 136,172,136 | 138,531,571 | CN Gain              |
| OS-T10 | 138,531,571 | 139,054,268 | Amplification        |
| OS-T10 | 139,054,268 | 139,361,804 | CN Gain              |
| OS-T10 | 139,361,804 | 139,757,281 | Amplification        |
| OS-T10 | 139,757,281 | 142,058,368 | CN Loss              |
| OS-T10 | 142,058,368 | 142,903,376 | CN Gain              |
| OS-T10 | 142,903,376 | 143,727,594 | CN Loss              |
| OS-T10 | 143,727,594 | 145,464,908 | CN Gain              |
| OS-T10 | 145,464,908 | 153,791,169 | CN Loss              |
| OS-T10 | 153,791,169 | 157,421,563 | Amplification        |
| OS-T10 | 157,421,563 | 161,538,169 | CN Gain              |
| OS-T10 | 161,538,169 | 163,375,793 | CN Loss              |
| OS-T10 | 163,375,793 | 164,649,824 | CN Gain              |
| OS-T10 | 164,649,824 | 170,899,992 | CN Loss              |
| OS-T11 | 0           | 4,755,971   | CN Gain              |
| OS-T11 | 4,755,971   | 17,394,157  | CN Loss              |
| OS-T11 | 43,144,968  | 46,232,914  | CN Gain              |
| OS-T11 | 46,232,914  | 58,722,020  | CN Loss              |
| OS-T11 | 62,040,890  | 170,899,992 | CN Loss              |
| OS-T12 | 0           | 41,230,683  | CN Gain              |
| OS-T12 | 41,230,683  | 57,538,119  | Amplification        |
| OS-T12 | 57,538,119  | 58,722,020  | CN Gain              |
| OS-T12 | 62,040,890  | 75,584,860  | CN Gain              |
| OS-T12 | 75,584,860  | 170,899,992 | CN Loss              |
| OS-T13 | 0           | 7,970,549   | CN Gain              |
| OS-T13 | 7,970,549   | 12,250,953  | CN Loss              |
| OS-T13 | 12,250,953  | 35,347,224  | CN Gain              |
| OS-T13 | 35,347,224  | 50,444,497  | Amplification        |
| OS-T13 | 50,444,497  | 58,722,020  | CN Gain              |
| OS-T13 | 62,040,890  | 101,051,500 | CN Loss              |
| OS-T13 | 101,051,500 | 140,639,758 | CN Gain              |
| OS-T13 | 140,639,758 | 170,899,992 | CN Loss              |
| OS-T14 | 0           | 36,606,525  | CN Loss              |
| OS-T14 | 36,606,525  | 52,391,487  | CN Gain              |
| OS-T14 | 52,391,487  | 58,722,020  | CN Loss              |
| OS-T14 | 62,040,890  | 170,899,992 | CN Loss              |
| OS-T15 | 0           | 7,218,405   | CN Loss              |

|        |            |             |         |
|--------|------------|-------------|---------|
| OS-T15 | 7,218,405  | 28,526,879  | CN Gain |
| OS-T15 | 28,526,879 | 29,716,795  | CN Loss |
| OS-T15 | 29,716,795 | 38,903,308  | CN Gain |
| OS-T15 | 38,903,308 | 58,722,020  | CN Loss |
| OS-T15 | 62,040,890 | 170,899,992 | CN Loss |



**Supplementary Table 4.** Chromosome 6p21 has one of the highest numbers of copy number transitions when taking cytoband size into account. Copy number transitions in multiple populations of tumours, including both gains and losses, were tallied for cytobands on human chromosome 6. The shaded row highlights cytoband 6p21 as having the highest number of copy number transitions in chromosome 6. Data was retrieved from the Progenetix CGH Database (see Materials and Methods).

| Cytoband on Chromosome 6 | Cytoband size (Mbp) | Number of copy number transitions |
|--------------------------|---------------------|-----------------------------------|
| p25                      | 7                   | 37                                |
| p24                      | 6.5                 | 85                                |
| p23                      | 2                   | 133                               |
| p22                      | 14.4                | 273                               |
| p21                      | 15.3                | 721                               |
| p12                      | 12                  | 218                               |
| p11                      | 3.3                 | 72                                |
| <i>CENTROMERE</i>        |                     |                                   |
| q11                      | 3                   | 21                                |
| q12                      | 6.5                 | 327                               |
| q13                      | 5.9                 | 181                               |
| q14                      | 11.6                | 222                               |
| q15                      | 4.6                 | 176                               |
| q16                      | 12.7                | 349                               |
| q21                      | 9.1                 | 383                               |
| q22                      | 16.5                | 484                               |
| q23                      | 8.7                 | 315                               |
| q24                      | 10                  | 351                               |
| q25                      | 11.8                | 249                               |
| q26                      | 3.5                 | 111                               |
| q27                      | 6.5                 | 28                                |

**Supplementary Table 5.** Genomic rearrangements in chromosome 6p are more frequent than in the majority of other chromosomal p regions. Genomic rearrangements for multiple tumour populations were quantified for each chromosome as well as each arm of same. The top ten ranked chromosomes are indicated for total number of rearrangements (shaded in blue) and for the ratio of rearrangements in the p arm of each chromosome to the total size of the genome (shaded in pink). The latter ratio is corrected to accurately take into account the size of the chromosomes. Chromosome 6 is in the top ten for total number of rearrangements and the 6p arm is in the top ten for ratio of p rearrangements to the total genome size. Data was retrieved from the UCSC Genome Browser and the Progenetix CGH Database (see Materials and Methods).

| Chromosome | Length of Chromosome (Mbp) | Length of p arm (Mbp) | Length of q arm (Mbp) | Number of rearrangements in p arm | Number of rearrangements in q arm | Total number rearrangements | Ratio of p rearrangements to chromosome length | Ratio of total rearrangements to chromosome length |
|------------|----------------------------|-----------------------|-----------------------|-----------------------------------|-----------------------------------|-----------------------------|------------------------------------------------|----------------------------------------------------|
| 1          | 247.25                     | 124.3                 | 122.95                | 3660                              | 3893                              | 7618                        | 14.80                                          | 30.81                                              |
| 2          | 242.95                     | 93.3                  | 149.65                | 1483                              | 2248                              | 4084                        | 6.10                                           | 16.81                                              |
| 3          | 199.5                      | 91.7                  | 107.8                 | 2996                              | 2555                              | 5926                        | 15.02                                          | 29.70                                              |
| 4          | 191.27                     | 50.7                  | 140.57                | 1446                              | 2642                              | 4791                        | 7.56                                           | 25.05                                              |
| 5          | 180.86                     | 47.7                  | 133.16                | 1911                              | 2681                              | 4965                        | 10.57                                          | 27.45                                              |
| 6          | 170.9                      | 60.5                  | 110.4                 | 1975                              | 3095                              | 5477                        | 11.56                                          | 32.05                                              |
| 7          | 158.82                     | 59.1                  | 99.72                 | 1570                              | 2214                              | 5031                        | 9.89                                           | 31.68                                              |
| 8          | 146.27                     | 45.2                  | 101.07                | 2743                              | 3718                              | 7003                        | 18.75                                          | 47.88                                              |
| 9          | 140.27                     | 51.8                  | 88.47                 | 2316                              | 2271                              | 5240                        | 16.51                                          | 37.36                                              |
| 10         | 135.27                     | 40.3                  | 94.97                 | 1041                              | 1684                              | 3462                        | 7.70                                           | 25.59                                              |
| 11         | 134.45                     | 52.9                  | 81.55                 | 1252                              | 3154                              | 4903                        | 9.31                                           | 36.47                                              |
| 12         | 132.35                     | 35.4                  | 96.95                 | 1487                              | 2423                              | 4337                        | 11.24                                          | 32.77                                              |
| 13         | 114.14                     | 16                    | 98.14                 | 43                                | 3638                              | 4454                        | 0.38                                           | 39.02                                              |
| 14         | 106.37                     | 15.6                  | 90.77                 | 27                                | 2196                              | 2869                        | 0.25                                           | 26.97                                              |
| 15         | 100.34                     | 17                    | 83.34                 | 41                                | 2038                              | 2510                        | 0.41                                           | 25.01                                              |
| 16         | 88.83                      | 38.2                  | 50.63                 | 1365                              | 1696                              | 3764                        | 15.37                                          | 42.37                                              |
| 17         | 78.77                      | 22.1                  | 56.67                 | 2157                              | 2496                              | 5682                        | 27.38                                          | 72.13                                              |
| 18         | 76.12                      | 16.1                  | 60.02                 | 996                               | 2124                              | 4051                        | 13.08                                          | 53.22                                              |
| 19         | 63.81                      | 28.5                  | 35.31                 | 674                               | 861                               | 2828                        | 10.56                                          | 44.32                                              |
| 20         | 62.44                      | 27.1                  | 35.34                 | 735                               | 1729                              | 3559                        | 11.77                                          | 57.00                                              |
| 21         | 46.94                      | 12.3                  | 34.64                 | 28                                | 1489                              | 2497                        | 0.60                                           | 53.20                                              |
| 22         | 49.69                      | 11.8                  | 37.89                 | 48                                | 937                               | 1708                        | 0.97                                           | 34.37                                              |
| X          | 154.91                     | 59.5                  | 95.41                 | 1020                              | 1373                              | 3617                        | 6.58                                           | 23.35                                              |
| Y          | 57.77                      | 11.3                  | 46.47                 | 27                                | 67                                | 560                         | 0.47                                           | 9.69                                               |

| Chromosome | Ratio of p rearrangements to total number of rearrangements in chromosome | Ratio of p rearrangements to size of whole genome | Ratio of q rearrangements to q length | Ratio of p rearrangements to p length |
|------------|---------------------------------------------------------------------------|---------------------------------------------------|---------------------------------------|---------------------------------------|
| 1          | 0.48                                                                      | 1.56E-04                                          | 31.66                                 | 29.44                                 |
| 2          | 0.36                                                                      | 1.18E-04                                          | 15.02                                 | 15.89                                 |
| 3          | 0.51                                                                      | 1.64E-04                                          | 23.70                                 | 32.67                                 |
| 4          | 0.30                                                                      | 9.80E-05                                          | 18.79                                 | 28.52                                 |
| 5          | 0.38                                                                      | 1.25E-04                                          | 20.13                                 | 40.06                                 |
| 6          | 0.36                                                                      | 1.17E-04                                          | 28.03                                 | 32.64                                 |
| 7          | 0.31                                                                      | 1.01E-04                                          | 22.20                                 | 26.57                                 |
| 8          | 0.39                                                                      | 1.27E-04                                          | 36.79                                 | 60.69                                 |
| 9          | 0.44                                                                      | 1.43E-04                                          | 25.67                                 | 44.71                                 |
| 10         | 0.30                                                                      | 9.76E-05                                          | 17.73                                 | 25.83                                 |
| 11         | 0.26                                                                      | 8.29E-05                                          | 38.68                                 | 23.67                                 |
| 12         | 0.34                                                                      | 1.11E-04                                          | 24.99                                 | 42.01                                 |
| 13         | 0.01                                                                      | 3.13E-06                                          | 37.07                                 | 2.69                                  |
| 14         | 0.01                                                                      | 3.06E-06                                          | 24.19                                 | 1.73                                  |
| 15         | 0.02                                                                      | 5.30E-06                                          | 24.45                                 | 2.41                                  |
| 16         | 0.36                                                                      | 1.18E-04                                          | 33.50                                 | 35.73                                 |
| 17         | 0.38                                                                      | 1.23E-04                                          | 44.04                                 | 97.60                                 |
| 18         | 0.25                                                                      | 7.98E-05                                          | 35.39                                 | 61.86                                 |
| 19         | 0.24                                                                      | 7.74E-05                                          | 24.38                                 | 23.65                                 |
| 20         | 0.21                                                                      | 6.70E-05                                          | 48.92                                 | 27.12                                 |
| 21         | 0.01                                                                      | 3.64E-06                                          | 42.98                                 | 2.28                                  |
| 22         | 0.03                                                                      | 9.12E-06                                          | 24.73                                 | 4.07                                  |
| X          | 0.28                                                                      | 9.16E-05                                          | 14.39                                 | 17.14                                 |
| Y          | 0.05                                                                      | 1.57E-05                                          | 1.44                                  | 2.39                                  |
